# Supplementary material for: Genetic diversity of leafy amaranth (Amaranthus tricolor L.) resources in Vietnam
Source: PubMed Central journal article supplement — Breed Sci. 2019 Oct 9;69(4):640–50. doi: 10.1270/jsbbs.19050 (PMC6977444; doi:10.1270/jsbbs.19050), 2019-10-09
Supplement: 69_19050_1.pdf [file 69_19050_1.pdf]

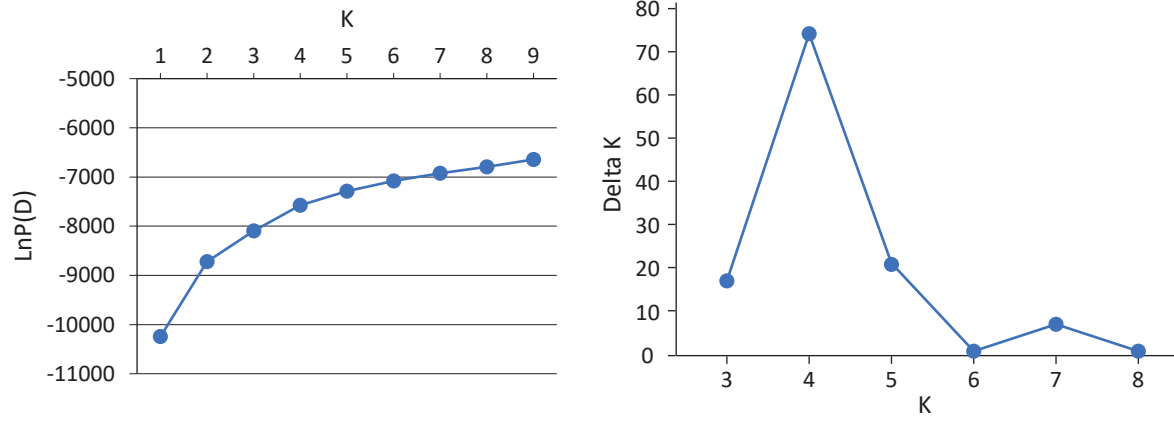

**Supplemental Fig. 1.** Plot of mean posterior probability (LnP(D)) values per clusters (K, based on 10 iterations per K) from STRUCTURE analyses (Pritchard et al. 2000), and delta K analysis of LnP(D) (Evanno et al. 2005) to estimate the genetic structure of 294 WA *A. tricolor* accessions.

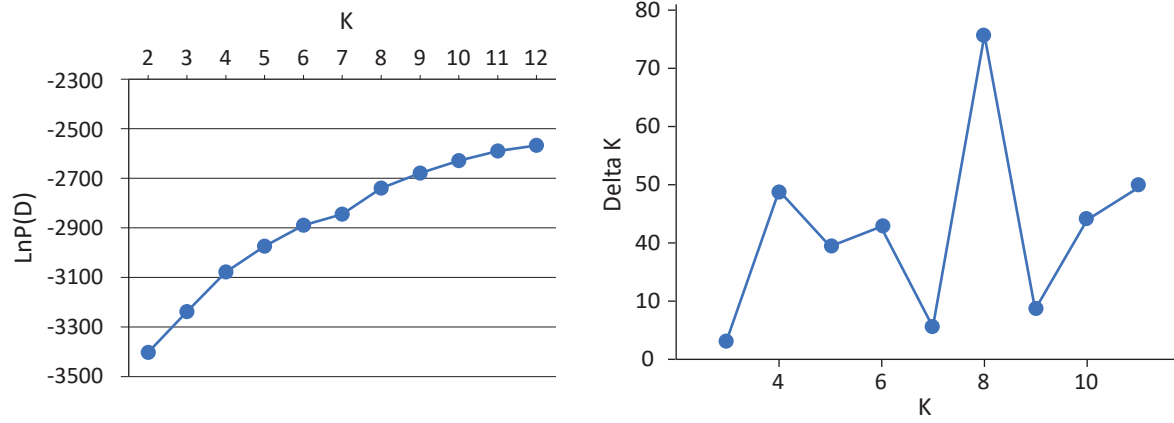

**Supplemental Fig. 2.** Plot of mean posterior probability (LnP(D)) values per clusters (K, based on 10 iterations per K) from STRUCTURE analyses (Pritchard et al. 2000), and delta K analysis of LnP(D) (Evanno et al. 2005) to estimate the genetic structure of 119 VA *A. tricolor* accessions.
