# Supplementary material for: Genetic diversity of leafy amaranth (Amaranthus tricolor L.) resources in Vietnam
Source: PubMed Central journal article supplement — Breed Sci. 2019 Oct 9;69(4):640–50. doi: 10.1270/jsbbs.19050 (PMC6977444; doi:10.1270/jsbbs.19050), 2019-10-09
Supplement: 69_19050_2.pdf [file 69_19050_2.pdf]

**Supplemental Table 1.** List of 272 Vietnamese amaranth accessions used in the current study

| No | Code  | Accession number | Local name            | Collection area     | Scientific name based on <i>matK</i> barcode phylogeny |
|----|-------|------------------|-----------------------|---------------------|--------------------------------------------------------|
| 1  | VA001 | 3700             | Rau den do            | Northeast           | <i>Amaranthus tricolor</i> L.                          |
| 2  | VA002 | 3701             | Rau den tim           | Northeast           | Hybrid complex                                         |
| 3  | VA003 | 3702             | Rau den tam the       | Northeast           | <i>Amaranthus tricolor</i> L.                          |
| 4  | VA004 | 3764             | Rau den do            | Northeast           | <i>Amaranthus tricolor</i> L.                          |
| 5  | VA005 | 3848             | Rau den xanh          | Northeast           | Hybrid complex                                         |
| 6  | VA006 | 3879             | Rau den               | North Central Coast | <i>Amaranthus tricolor</i> L.                          |
| 7  | VA007 | 5484             | Rau den xanh          | Northeast           | <i>Amaranthus dubius</i> Mart. ex Thell                |
| 8  | VA008 | 5485             | Peec ngan sai         | Northeast           | <i>Amaranthus dubius</i> Mart. ex Thell                |
| 9  | VA009 | 5486             | Rau den               | Northeast           | <i>Amaranthus dubius</i> Mart. ex Thell                |
| 10 | VA010 | 5487             | Rau den do            | Northeast           | <i>Amaranthus tricolor</i> L.                          |
| 11 | VA011 | 5489             | Den đò                | Northwest           | <i>Amaranthus tricolor</i> L.                          |
| 12 | VA012 | 5490             | Rau den ca            | Northwest           | <i>Amaranthus tricolor</i> L.                          |
| 13 | VA013 | 5491             | Rau den ta dang 1     | Northwest           | <i>Amaranthus dubius</i> Mart. ex Thell                |
| 14 | VA014 | 5492             | Rau den trang dang 1  | Northwest           | <i>Amaranthus tricolor</i> L.                          |
| 15 | VA015 | 5493             | Rau den mao ga dang 1 | Northwest           | <i>Amaranthus tricolor</i> L.                          |
| 16 | VA016 | 5496             | Rau den do dang 1     | Northeast           | <i>Amaranthus tricolor</i> L.                          |
| 17 | VA017 | 5497             | Rau den               | Southeast           | <i>Amaranthus tricolor</i> L.                          |
| 18 | VA018 | 5499             | Rau den dai           | Central Highlands   | Hybrid complex                                         |
| 19 | VA019 | 5500             | Rau den dai           | Central Highlands   | <i>Amaranthus tricolor</i> L.                          |
| 20 | VA020 | 5501             | Rau den               | Southeast           | <i>Amaranthus tricolor</i> L.                          |
| 21 | VA021 | 5502             | Rau den               | Southwest           | <i>Amaranthus tricolor</i> L.                          |
| 22 | VA022 | 5503             | Rau den               | Southwest           | <i>Amaranthus tricolor</i> L.                          |
| 23 | VA023 | 5504             | Rau den dai           | Southwest           | <i>Amaranthus tricolor</i> L.                          |
| 24 | VA024 | 5505             | Rau den do            | Southwest           | <i>Amaranthus tricolor</i> L.                          |
| 25 | VA025 | 5506             | Rau den               | Southwest           | <i>Amaranthus tricolor</i> L.                          |
| 26 | VA026 | 5507             | Rau den               | Southwest           | <i>Amaranthus tricolor</i> L.                          |
| 27 | VA027 | 5508             | Den do                | Southeast           | <i>Amaranthus tricolor</i> L.                          |
| 28 | VA028 | 5509             | Den trang             | Southeast           | <i>Amaranthus tricolor</i> L.                          |
| 29 | VA029 | 5510             | Den trang             | Southeast           | <i>Amaranthus tricolor</i> L.                          |
| 30 | VA030 | 5511             | Den tia               | Southwest           | <i>Amaranthus tricolor</i> L.                          |
| 31 | VA031 | 5512             | Rau den               | Red River Delta     | <i>Amaranthus tricolor</i> L.                          |
| 32 | VA032 | 6543             | Rau den Trung Quoc    | Northwest           | <i>Amaranthus dubius</i> Mart. ex Thell                |
| 33 | VA033 | 6544             | Rau den               | Southwest           | <i>Amaranthus tricolor</i> L.                          |
| 34 | VA034 | 6615             | Rau den               | Central Highlands   | <i>Amaranthus tricolor</i> L.                          |
| 35 | VA035 | 6616             | Rau den trang         | Central Highlands   | <i>Amaranthus tricolor</i> L.                          |
| 36 | VA036 | 6617             | Den do                | Central Highlands   | <i>Amaranthus tricolor</i> L.                          |
| 37 | VA037 | 6618             | Den tia               | Central Highlands   | Hybrid complex                                         |
| 38 | VA038 | 6619             | Den trang             | Northeast           | Hybrid complex                                         |
| 39 | VA039 | 6620             | Rau den               | Northeast           | <i>Amaranthus tricolor</i> L.                          |
| 40 | VA040 | 6753             | Rau den trang         | Northeast           | <i>Amaranthus viridis</i> L.                           |
| 41 | VA041 | 6882             | Rau den do            | North Central Coast | <i>Amaranthus tricolor</i> L.                          |
| 42 | VA042 | 6883             | Rau den do            | North Central Coast | <i>Amaranthus tricolor</i> L.                          |
| 43 | VA043 | 6884             | Rau den trang         | North Central Coast | <i>Amaranthus tricolor</i> L.                          |
| 44 | VA044 | 6885             | Rau den tia           | North Central Coast | <i>Amaranthus tricolor</i> L.                          |
| 45 | VA045 | 7961             | Rau gien tia          | North Central Coast | Hybrid complex                                         |
| 46 | VA046 | 7962             | Pac hom               | North Central Coast | <i>Amaranthus dubius</i> Mart. ex Thell                |
| 47 | VA047 | 7963             | Phac hom              | Northwest           | <i>Amaranthus dubius</i> Mart. ex Thell                |
| 48 | VA048 | 8999             | Rau den               | Northeast           | Hybrid complex                                         |
| 49 | VA049 | 9000             | Rau den               | Red River Delta     | <i>Amaranthus tricolor</i> L.                          |
| 50 | VA050 | 9001             | Rau den               | Red River Delta     | <i>Amaranthus tricolor</i> L.                          |

| No  | Code  | Accession number | Local name            | Collection area     | Scientific name based on <i>matK</i> barcode phylogeny |
|-----|-------|------------------|-----------------------|---------------------|--------------------------------------------------------|
| 51  | VA051 | 9002             | Rau den               | Red River Delta     | <i>Amaranthus tricolor</i> L.                          |
| 52  | VA052 | 9003             | Rau den               | Red River Delta     | <i>Amaranthus tricolor</i> L.                          |
| 53  | VA053 | 9004             | Rau den ta dang 2     | Northwest           | <i>Amaranthus tricolor</i> L.                          |
| 54  | VA054 | 9005             | Rau den trang dang 2  | Northwest           | <i>Amaranthus tricolor</i> L.                          |
| 55  | VA055 | 9006             | Rau den mao ga dang 2 | Northwest           | <i>Amaranthus tricolor</i> L.                          |
| 56  | VA056 | 9007             | Rau den mao ga dang 3 | Northwest           | <i>Amaranthus tricolor</i> L.                          |
| 57  | VA057 | 9008             | Rau den mao ga dang 4 | Northwest           | <i>Amaranthus tricolor</i> L.                          |
| 58  | VA058 | 9009             | Rau den mao ga dang 5 | Northwest           | <i>Amaranthus tricolor</i> L.                          |
| 59  | VA059 | 9010             | Rau den mao ga dang 6 | Northwest           | <i>Amaranthus tricolor</i> L.                          |
| 60  | VA060 | 9011             | Rau den do dang 2     | Northeast           | <i>Amaranthus tricolor</i> L.                          |
| 61  | VA061 | 9012             | Rau den               | Central Highlands   | <i>Amaranthus dubius</i> Mart. ex Thell                |
| 62  | VA062 | 9013             | Phac hom nang         | Northwest           | <i>Amaranthus tricolor</i> L.                          |
| 63  | VA063 | 9014             | Den tia               | North Central Coast | <i>Amaranthus tricolor</i> L.                          |
| 64  | VA064 | 9015             | Gien do               | Red River Delta     | <i>Amaranthus tricolor</i> L.                          |
| 65  | VA065 | 9806             | Rau gien trang        | North Central Coast | <i>Amaranthus dubius</i> Mart. ex Thell                |
| 66  | VA066 | 12512            | Rau den               | Central Highlands   | Hybrid complex                                         |
| 67  | VA067 | 12518            | Rau gien              | Southwest           | <i>Amaranthus tricolor</i> L.                          |
| 68  | VA068 | 12861            | Phac hom              | Northwest           | <i>Amaranthus dubius</i> Mart. ex Thell                |
| 69  | VA069 | 13712            | Den tia               | Central Highlands   | Hybrid complex                                         |
| 70  | VA070 | 13713            | Rau gien do           | Northeast           | <i>Amaranthus tricolor</i> L.                          |
| 71  | VA071 | 13714            | Tac trenh             | Northwest           | <i>Amaranthus dubius</i> Mart. ex Thell                |
| 72  | VA072 | 15333            | Tac trenh cang        | Northwest           | <i>Amaranthus tricolor</i> L.                          |
| 73  | VA073 | 15334            | Tac trenh thia        | Northwest           | <i>Amaranthus tricolor</i> L.                          |
| 74  | VA074 | 15338            | Rau den trang         | Northeast           | <i>Amaranthus dubius</i> Mart. ex Thell                |
| 75  | VA075 | 15339            | Pac hom               | Northwest           | <i>Amaranthus blitum</i> L.                            |
| 76  | VA076 | 15341            | Phac hom              | Northwest           | <i>Amaranthus tricolor</i> L.                          |
| 77  | VA077 | 15342            | Pac hom               | Northwest           | <i>Amaranthus blitum</i> L.                            |
| 78  | VA078 | 15343            | Phac hom              | Northwest           | Hybrid complex                                         |
| 79  | VA079 | 15344            | Phac hum khao         | Northwest           | <i>Amaranthus blitum</i> L.                            |
| 80  | VA080 | 15345            | Phac hom              | Northwest           | <i>Amaranthus blitum</i> L.                            |
| 81  | VA081 | 15346            | Xu ntu                | Northwest           | Hybrid complex                                         |
| 82  | VA082 | 15347            | Xu ntu                | Northwest           | Hybrid complex                                         |
| 83  | VA083 | 15348            | Ru gien               | Northwest           | <i>Amaranthus tricolor</i> L.                          |
| 84  | VA084 | 15349            | Cha ni go chu         | Northwest           | Hybrid complex                                         |
| 85  | VA085 | 15350            | Song lu               | Northwest           | <i>Amaranthus blitum</i> L.                            |
| 86  | VA086 | 15351            | Phac hom              | Northwest           | Hybrid complex                                         |
| 87  | VA087 | 15352            | Xu tu                 | Northwest           | Hybrid complex                                         |
| 88  | VA088 | 15353            | Chun tu               | Northwest           | <i>Amaranthus dubius</i> Mart. ex Thell                |
| 89  | VA089 | 15354            | Phác hòm danh         | Northwest           | <i>Amaranthus tricolor</i> L.                          |
| 90  | VA090 | 15355            | Xung tu               | Northwest           | <i>Amaranthus tricolor</i> L.                          |
| 91  | VA091 | 15356            | Phac hom              | Northwest           | <i>Amaranthus blitum</i> L.                            |
| 92  | VA092 | 15357            | Phac hom              | Northwest           | <i>Amaranthus blitum</i> L.                            |
| 93  | VA093 | 15358            | Phac hom              | Northwest           | <i>Amaranthus blitum</i> L.                            |
| 94  | VA094 | 15359            | Phac hom              | Northwest           | <i>Amaranthus blitum</i> L.                            |
| 95  | VA095 | 15361            | Su ntu                | Northeast           | Hybrid complex                                         |
| 96  | VA096 | 15363            | Thanh my la           | Northeast           | Hybrid complex                                         |
| 97  | VA097 | 15364            | Pac hom               | Northeast           | <i>Amaranthus blitum</i> L.                            |
| 98  | VA098 | 15365            | Pac hom               | Northeast           | <i>Amaranthus blitum</i> L.                            |
| 99  | VA099 | 15366            | Phac hom              | Northwest           | <i>Amaranthus blitum</i> L.                            |
| 100 | VA100 | 16697            | Den trang             | Central Highlands   | <i>Amaranthus tricolor</i> L.                          |

| No  | Code  | Accession number | Local name      | Collection area     | Scientific name based on <i>matK</i> barcode phylogeny |
|-----|-------|------------------|-----------------|---------------------|--------------------------------------------------------|
| 101 | VA101 | 16698            | Den do          | Central Highlands   | Hybrid complex                                         |
| 102 | VA102 | 16700            | Phac khum       | Northwest           | Hybrid complex                                         |
| 103 | VA103 | 16701            | Rau den         | Northwest           | <i>Amaranthus dubius</i> Mart. ex Thell                |
| 104 | VA104 | 16702            | Phac hum        | Northwest           | Hybrid complex                                         |
| 105 | VA105 | 16703            | Xu tu           | Northeast           | Hybrid complex                                         |
| 106 | VA106 | 16704            | Su du           | Northeast           | Hybrid complex                                         |
| 107 | VA107 | 16705            | Xuong tu        | Northeast           | Hybrid complex                                         |
| 108 | VA108 | 16706            | Thanh li        | Northeast           | Hybrid complex                                         |
| 109 | VA109 | 16707            | Su tu           | Northeast           | Hybrid complex                                         |
| 110 | VA110 | 16708            | Rau gien do     | Northeast           | <i>Amaranthus tricolor</i> L.                          |
| 111 | VA111 | 16709            | Den do          | South Central Coast | <i>Amaranthus tricolor</i> L.                          |
| 112 | VA112 | 16710            | Den trang       | South Central Coast | Hybrid complex                                         |
| 113 | VA113 | 16711            | Larom           | South Central Coast | Hybrid complex                                         |
| 114 | VA114 | 16712            | Ro hum dom      | Central Highlands   | Hybrid complex                                         |
| 115 | VA115 | 16713            | Ro hum bo       | Central Highlands   | Hybrid complex                                         |
| 116 | VA116 | 16714            | Rohum dom po he | Central Highlands   | Hybrid complex                                         |
| 117 | VA117 | 16715            | Rohum dom       | Central Highlands   | Hybrid complex                                         |
| 118 | VA118 | 16716            | Rohum bo        | Central Highlands   | Hybrid complex                                         |
| 119 | VA119 | 16717            | Rohum pro he    | Central Highlands   | Hybrid complex                                         |
| 120 | VA120 | 16718            | Rau den         | Central Highlands   | <i>Amaranthus tricolor</i> L.                          |
| 121 | VA121 | 16719            | Ro hum brah     | Central Highlands   | Hybrid complex                                         |
| 122 | VA122 | 20460            | Soongs tu       | Northeast           | Hybrid complex                                         |
| 123 | VA123 | 20462            | Xe mi say       | Northwest           | Hybrid complex                                         |
| 124 | VA124 | 20464            | Sung tu         | Northwest           | Hybrid complex                                         |
| 125 | VA125 | 20465            | Rau huan        | Northwest           | Hybrid complex                                         |
| 126 | VA126 | 20467            | Thung tu        | Northeast           | Hybrid complex                                         |
| 127 | VA127 | 20468            | Phec gien       | Northeast           | Hybrid complex                                         |
| 128 | VA128 | 20472            | Phec hom        | Northeast           | <i>Amaranthus tricolor</i> L.                          |
| 129 | VA129 | 20473            | Pe dup          | South Central Coast | <i>Amaranthus viridis</i> L.                           |
| 130 | VA130 | 20475            | Rau gien        | Northeast           | <i>Amaranthus tricolor</i> L.                          |
| 131 | VA131 | 20476            | Rau gien        | South Central Coast | <i>Amaranthus tricolor</i> L.                          |
| 132 | VA132 | 20478            | Rau gien        | Northeast           | <i>Amaranthus tricolor</i> L.                          |
| 133 | VA133 | 20479            | Rau gien        | Northeast           | <i>Amaranthus tricolor</i> L.                          |
| 134 | VA134 | 20488            | Rau den la do   | South Central Coast | <i>Amaranthus tricolor</i> L.                          |
| 135 | VA135 | 20489            | Den do          | South Central Coast | <i>Amaranthus tricolor</i> L.                          |
| 136 | VA137 | 20492            | Song tu         | Northeast           | Hybrid complex                                         |
| 137 | VA138 | 22078            | Nong lu         | Northwest           | Hybrid complex                                         |
| 138 | VA139 | 22079            | Phac hom        | Northwest           | <i>Amaranthus blitum</i> L.                            |
| 139 | VA140 | 22080            | Phac hom        | Northwest           | <i>Amaranthus blitum</i> L.                            |
| 140 | VA141 | 22081            | Hang sai        | Northeast           | Hybrid complex                                         |
| 141 | VA142 | 22082            | Rhum            | Central Highlands   | Hybrid complex                                         |
| 142 | VA143 | 22083            | Rau den trang   | Southwest           | <i>Amaranthus dubius</i> Mart. ex Thell                |
| 143 | VA144 | 22084            | Pe rup          | South Central Coast | <i>Amaranthus tricolor</i> L.                          |
| 144 | VA145 | 22094            | Phac hom        | Northwest           | <i>Amaranthus tricolor</i> L.                          |
| 145 | VA146 | 22095            | Rau gien        | Northwest           | <i>Amaranthus tricolor</i> L.                          |
| 146 | VA147 | 22096            | Giay hen thi    | Northeast           | Hybrid complex                                         |
| 147 | VA148 | T00813           | Rau den         | Northeast           | <i>Amaranthus dubius</i> Mart. ex Thell                |
| 148 | VA149 | T08318           | Rhum            | Central Highlands   | Hybrid complex                                         |
| 149 | VA150 | T08323           | Rau den         | Central Highlands   | <i>Amaranthus dubius</i> Mart. ex Thell                |
| 150 | VA151 | T08324           | Den trang       | Central Highlands   | Hybrid complex                                         |

| No  | Code               | Accession number | Local name                | Collection area     | Scientific name based on <i>matK</i> barcode phylogeny |
|-----|--------------------|------------------|---------------------------|---------------------|--------------------------------------------------------|
| 151 | VA152              | T09381           | Gay hen                   | Northeast           | Hybrid complex                                         |
| 152 | VA153              | T09677           | Phyac hom                 | Northeast           | Hybrid complex                                         |
| 153 | VA154              | T09725           | Rau gien                  | Northeast           | Hybrid complex                                         |
| 154 | VA155              | T09726           | Rau thun tum              | Northeast           | Hybrid complex                                         |
| 155 | VA156              | T09779           | Song du                   | Northeast           | Hybrid complex                                         |
| 156 | VA158              | T09797           | Rau den                   | Red River Delta     | <i>Amaranthus tricolor</i> L.                          |
| 157 | VA159              | T09826           | Rau den                   | Red River Delta     | <i>Amaranthus tricolor</i> L.                          |
| 158 | VA160              | T09827           | Rau den                   | Red River Delta     | <i>Amaranthus tricolor</i> L.                          |
| 159 | VA161              | T12249           | Rau khong dau             | Northeast           | Hybrid complex                                         |
| 160 | VA162              | T12251           | Kla dun                   | Northwest           | <i>Amaranthus tricolor</i> L.                          |
| 161 | VA163              | T12252           | Phac cat                  | Northwest           | <i>Amaranthus viridis</i> L.                           |
| 162 | VA164              | T12257           | Xe mi say                 | Northwest           | Hybrid complex                                         |
| 163 | VA165              | T12259           | Thung tu                  | Northeast           | Hybrid complex                                         |
| 164 | VA166              | T12262           | Phac hom                  | Northeast           | Hybrid complex                                         |
| 165 | VA167              | T12266           | Gien com                  | Northeast           | <i>Amaranthus viridis</i> L.                           |
| 166 | VA168              | T12270           | Gien mat nguyet           | Northeast           | <i>Amaranthus tricolor</i> L.                          |
| 167 | VA170              | T15696           | Rau gien                  | Northeast           | <i>Amaranthus tricolor</i> L.                          |
| 168 | VA171              | T15706           | Rau gien                  | Northeast           | <i>Amaranthus tricolor</i> L.                          |
| 169 | VA172              | T17582           | Rau gien com              | Northeast           | <i>Amaranthus blitum</i> L.                            |
| 170 | VA173              | T21421           | Rau gien                  | Southwest           | <i>Amaranthus tricolor</i> L.                          |
| 171 | VA174              | T21422           | Rau gien                  | Southwest           | <i>Amaranthus dubius</i> Mart. ex Thell                |
| 172 | VA175              | T21424           | Rau den                   | Southwest           | <i>Amaranthus tricolor</i> L.                          |
| 173 | VA176              | T21425           | Hlahnhem                  | Central Highlands   | <i>Amaranthus tricolor</i> L.                          |
| 174 | VA177              | T21426           | Rau den                   | Central Highlands   | <i>Amaranthus tricolor</i> L.                          |
| 175 | VA178              | 5498             | Rau den                   | Central Highlands   | Hybrid complex                                         |
| 176 | VA179 <sup>a</sup> | 16699            | Rau gien                  | Unknown             | Hybrid complex                                         |
| 177 | VA180              | 20469            | Gien 10                   | Northeast           | <i>Amaranthus tricolor</i> L.                          |
| 178 | VA181              | 20470            | Gien tia                  | Northeast           | <i>Amaranthus tricolor</i> L.                          |
| 179 | VA182              | 20481            | Den com                   | Northwest           | <i>Amaranthus blitum</i> L.                            |
| 180 | VA183              | 20482            | Rau den do                | Central Highlands   | <i>Amaranthus tricolor</i> L.                          |
| 181 | VA184              | 20483            | Rau den tieu              | South Central Coast | <i>Amaranthus tricolor</i> L.                          |
| 182 | VA185              | 20484            | Rau den do                | South Central Coast | <i>Amaranthus tricolor</i> L.                          |
| 183 | VA186              | 20485            | Rau den do                | South Central Coast | <i>Amaranthus tricolor</i> L.                          |
| 184 | VA187              | 20486            | Rau den la xanh           | South Central Coast | <i>Amaranthus tricolor</i> L.                          |
| 185 | VA188              | 20487            | Rau den la do             | South Central Coast | <i>Amaranthus tricolor</i> L.                          |
| 186 | VA189              | 20493            | Sien mi Sai               | Northeast           | Hybrid complex                                         |
| 187 | VA190              | 22085            | Pac hom lanh              | Northwest           | <i>Amaranthus tricolor</i> L.                          |
| 188 | VA191              | 22086            | Den trang la tron, nho    | North Central Coast | <i>Amaranthus tricolor</i> L.                          |
| 189 | VA192              | 22087            | Den trang la ngon, to dai | North Central Coast | <i>Amaranthus tricolor</i> L.                          |
| 190 | VA193              | 22088            | Den do dam la tron        | North Central Coast | <i>Amaranthus tricolor</i> L.                          |
| 191 | VA194              | 22089            | Den tím thân đỏ           | North Central Coast | <i>Amaranthus tricolor</i> L.                          |
| 192 | VA195              | 22090            | Den tím thân tím          | North Central Coast | <i>Amaranthus tricolor</i> L.                          |
| 193 | VA196              | 22091            | Den tía                   | North Central Coast | <i>Amaranthus tricolor</i> L.                          |
| 194 | VA197              | 22093            | Den kim                   | North Central Coast | <i>Amaranthus tricolor</i> L.                          |
| 195 | VA198              | 22094            | Rau gien                  | Northeast           | <i>Amaranthus tricolor</i> L.                          |
| 196 | VA199              | 22096            | Giay hen thi              | Northeast           | <i>Amaranthus tricolor</i> L.                          |
| 197 | VA200              | T05901           | Phac hom                  | Northwest           | <i>Amaranthus blitum</i> L.                            |
| 198 | VA201              | T08318           | Rhum                      | Central Highlands   | <i>Amaranthus dubius</i> Mart. ex Thell                |
| 199 | VA202              | T08952           | Phac lam                  | Northeast           | Hybrid complex                                         |
| 200 | VA203              | T09675           | Quy go                    | Northeast           | Hybrid complex                                         |

| No  | Code               | Accession number | Local name          | Collection area     | Scientific name based on <i>matK</i> barcode phylogeny |
|-----|--------------------|------------------|---------------------|---------------------|--------------------------------------------------------|
| 201 | VA204              | T09676           | Quy go pu           | Northeast           | <i>Amaranthus dubius</i> Mart. ex Thell                |
| 202 | VA205              | T12239           | Gien xanh           | Northeast           | <i>Amaranthus dubius</i> Mart. ex Thell                |
| 203 | VA206              | T12261           | Phec hom            | Northeast           | <i>Amaranthus tricolor</i> L.                          |
| 204 | VA207              | T12263           | Xi xanh             | Northeast           | Hybrid complex                                         |
| 205 | VA208              | T12264           | Xi xanh             | Northeast           | Hybrid complex                                         |
| 206 | VA209              | T12265           | Sac ham             | Northeast           | Hybrid complex                                         |
| 207 | VA210              | T12268           | Gien gai trang      | Northeast           | Hybrid complex                                         |
| 208 | VA211              | T15687           | Phec hom            | Northeast           | <i>Amaranthus dubius</i> Mart. ex Thell                |
| 209 | VA212              | T15689           | Phac hom            | Northeast           | Hybrid complex                                         |
| 210 | VA213              | T15690           | Vi ky               | Northeast           | <i>Amaranthus dubius</i> Mart. ex Thell                |
| 211 | VA214              | T15691           | Hla tre             | Central Highlands   | <i>Amaranthus tricolor</i> L.                          |
| 212 | VA215              | T15692           | Lah Hrum            | Central Highlands   | Hybrid complex                                         |
| 213 | VA216              | T15699           | Rau gien            | Central Highlands   | <i>Amaranthus tricolor</i> L.                          |
| 214 | VA217              | T15702           | Gien com            | South Central Coast | Hybrid complex                                         |
| 215 | VA218              | T15703           | Rau gien com        | South Central Coast | Hybrid complex                                         |
| 216 | VA219              | T15705           | Gien com            | South Central Coast | <i>Amaranthus tricolor</i> L.                          |
| 217 | VA220              | T17583           | Rau den do          | Northeast           | <i>Amaranthus tricolor</i> L.                          |
| 218 | VA221              | T17584           | Den do              | Northwest           | <i>Amaranthus tricolor</i> L.                          |
| 219 | VA222              | T17589           | Rau den do          | South Central Coast | <i>Amaranthus dubius</i> Mart. ex Thell                |
| 220 | VA223              | T17596           | Rau den la xanh     | South Central Coast | <i>Amaranthus tricolor</i> L.                          |
| 221 | VA224              | T17597           | Den 3 mau           | South Central Coast | <i>Amaranthus tricolor</i> L.                          |
| 222 | VA225              | T17598           | Den trang           | South Central Coast | Hybrid complex                                         |
| 223 | VA226 <sup>a</sup> | T17858           | Den com             | Unknown             | <i>Amaranthus viridis</i> L.                           |
| 224 | VA227 <sup>a</sup> | T17859           | Rau den trang       | Unknown             | Hybrid complex                                         |
| 225 | VA228 <sup>a</sup> | T17860           | Rau den             | Unknown             | Hybrid complex                                         |
| 226 | VA229              | T20471           | Den do la nhon, dai | North Central Coast | <i>Amaranthus tricolor</i> L.                          |
| 227 | VA230              | T20475           | Den do              | North Central Coast | <i>Amaranthus tricolor</i> L.                          |
| 228 | VA231              | T20481           | Phac hom            | Northwest           | <i>Amaranthus tricolor</i> L.                          |
| 229 | VA232              | T20485           | Pac ham             | Northeast           | <i>Amaranthus dubius</i> Mart. ex Thell                |
| 230 | VA233              | T20486           | Pac ham             | Northeast           | <i>Amaranthus tricolor</i> L.                          |
| 231 | VA234              | T20487           | Rau gien            | Northwest           | <i>Amaranthus tricolor</i> L.                          |
| 232 | VA235              | T20490           | Ro ham              | Central Highlands   | <i>Amaranthus tricolor</i> L.                          |
| 233 | VA236              | T20494           | Rau gien            | Northeast           | Hybrid complex                                         |
| 234 | VA237              | T20495           | Tau le              | Northeast           | Hybrid complex                                         |
| 235 | VA238              | T20496           | Phec hom dinh       | Northeast           | <i>Amaranthus tricolor</i> L.                          |
| 236 | VA239              | T20536           | Ray hieen           | Northeast           | <i>Amaranthus dubius</i> Mart. ex Thell                |
| 237 | VA240              | T21423           | Rau gien            | Southwest           | <i>Amaranthus tricolor</i> L.                          |
| 238 | VA241              | T17601           | Den Mui             | South Central Coast | <i>Amaranthus blitum</i> L.                            |
| 239 | VA242              | T17605           | Ro sun tu           | Northwest           | Hybrid complex                                         |
| 240 | VA243              | T23028           | Pac ham             | Northeast           | <i>Amaranthus tricolor</i> L.                          |
| 241 | VA244              | 2016.01          | Rau den ta          | North Central Coast | <i>Amaranthus dubius</i> Mart. ex Thell                |
| 242 | VA245              | 2016.02          | Rau gien gai        | North Central Coast | Hybrid complex                                         |
| 243 | VA246              | 2016.03          | Rau gien gai        | North Central Coast | Hybrid complex                                         |
| 244 | VA247              | 2016.04          | Rau gien gai        | North Central Coast | Hybrid complex                                         |
| 245 | VA248              | 2016.05          | Pha hom             | North Central Coast | Hybrid complex                                         |
| 246 | VA249              | 2016.13          | Lai Le xi           | North Central Coast | <i>Amaranthus tricolor</i> L.                          |
| 247 | VA251              | 2016.16          | Lai Le pua          | North Central Coast | <i>Amaranthus dubius</i> Mart. ex Thell                |
| 248 | VA252              | 2016.24          | Phac hom le         | North Central Coast | <i>Amaranthus dubius</i> Mart. ex Thell                |
| 249 | VA253              | 2016.25          | Phac hom danh       | North Central Coast | <i>Amaranthus tricolor</i> L.                          |
| 250 | VA254              | 2016.26          | Phac hom            | North Central Coast | <i>Amaranthus dubius</i> Mart. ex Thell                |

| No  | Code  | Accession number | Local name           | Collection area     | Scientific name based on <i>matK</i> barcode phylogeny |
|-----|-------|------------------|----------------------|---------------------|--------------------------------------------------------|
| 251 | VA255 | 2016.34          | Phac hom             | North Central Coast | <i>Amaranthus dubius</i> Mart. ex Thell                |
| 252 | VA256 | 2016.36          | Phac hom             | North Central Coast | <i>Amaranthus dubius</i> Mart. ex Thell                |
| 253 | VA257 | 2016.37          | Phac hom             | North Central Coast | <i>Amaranthus dubius</i> Mart. ex Thell                |
| 254 | VA258 | 2016.38          | Phac hom             | North Central Coast | <i>Amaranthus dubius</i> Mart. ex Thell                |
| 255 | VA259 | 2016.39          | Phac hom             | North Central Coast | Hybrid complex                                         |
| 256 | VA260 | 2016.40          | Phac hom             | North Central Coast | <i>Amaranthus dubius</i> Mart. ex Thell                |
| 257 | VA261 | 2016.41          | Phac hom             | North Central Coast | <i>Amaranthus dubius</i> Mart. ex Thell                |
| 258 | VA263 | 2016.45          | Sau trenh            | North Central Coast | <i>Amaranthus viridis</i> L.                           |
| 259 | VA264 | 2016.46          | Rau gien canh        | North Central Coast | Hybrid complex                                         |
| 260 | VA265 | 2016.47          | Sau trenh            | North Central Coast | Hybrid complex                                         |
| 261 | VA266 | 2016.49          | Sau trenh kai        | North Central Coast | <i>Amaranthus dubius</i> Mart. ex Thell                |
| 262 | VA269 | 2016.52          | Rau gien xanh        | North Central Coast | <i>Amaranthus dubius</i> Mart. ex Thell                |
| 263 | VA270 | 2016.53          | Rau gien gai         | North Central Coast | Hybrid complex                                         |
| 264 | VA271 | 2016.54          | Rau gien do          | North Central Coast | <i>Amaranthus dubius</i> Mart. ex Thell                |
| 265 | VA272 | 2016.56          | Phac hom             | North Central Coast | <i>Amaranthus dubius</i> Mart. ex Thell                |
| 266 | VA273 | 2016.66          | Phac hom deng        | North Central Coast | <i>Amaranthus tricolor</i> L.                          |
| 267 | VA275 | 2016.68          | Phac hom khau        | North Central Coast | <i>Amaranthus dubius</i> Mart. ex Thell                |
| 268 | VA276 | 2016.72          | Phac hom nam deng    | North Central Coast | <i>Amaranthus tricolor</i> L.                          |
| 269 | VA277 | 2016.76          | Clom                 | North Central Coast | Hybrid complex                                         |
| 270 | VA278 | 2016.77          | Rau gien xanh co gai | North Central Coast | Hybrid complex                                         |
| 271 | VA279 | T20457           | Phac hom deng        | Unknown             | Hybrid complex                                         |
| 272 | VA280 | T20463           | Phac hom hao         | Unknown             | Hybrid complex                                         |

<sup>a</sup>These accessions were imported from the World Vegetable Center.

**Supplemental Table 2.** List of 182 WA amaranth accessions using in the current study

| No | Code  | Name               | Scientific name                      | Seed distributor | Country of collection |
|----|-------|--------------------|--------------------------------------|------------------|-----------------------|
| 1  | WA001 | Irokoina           | <i>Amaranthus tricolor</i> L.        | Seed company     | na                    |
| 2  | WA002 | Biam               | <i>Amaranthus tricolor</i> L.        | Seed company     | na                    |
| 3  | WA003 | Green Pointed Leaf | <i>Amaranthus tricolor</i> L.        | Seed company     | na                    |
| 4  | WA004 | Red Stripe Leaf    | <i>Amaranthus tricolor</i> L.        | Seed company     | na                    |
| 5  | WA005 | White Leaf         | <i>Amaranthus tricolor</i> L.        | Seed company     | na                    |
| 6  | WA006 | Tender Leaf        | <i>Amaranthus tricolor</i> L.        | Seed company     | na                    |
| 7  | WA007 | Green Round Leaf   | <i>Amaranthus tricolor</i> L.        | Seed company     | na                    |
| 8  | WA008 | Southern Red       | <i>Amaranthus tricolor</i> L.        | Seed company     | na                    |
| 9  | WA009 | Asia Red           | <i>Amaranthus tricolor</i> L.        | Seed company     | na                    |
| 10 | WA010 | New Aztec          | <i>Amaranthus hypochondriacus</i> L. | NARO Genebank    | Japan                 |
| 11 | WA011 | Ames-2051          | <i>Amaranthus tricolor</i> L.        | USDA             | Indonesia             |
| 12 | WA012 | Ames-2091          | <i>Amaranthus tricolor</i> L.        | USDA             | Nepal                 |
| 13 | WA013 | Ames-5102          | <i>Amaranthus tricolor</i> L.        | USDA             | Hong Kong             |
| 14 | WA014 | Ames-5368          | <i>Amaranthus tricolor</i> L.        | USDA             | Bangladesh            |
| 15 | WA015 | Ames-29034         | <i>Amaranthus tricolor</i> L.        | USDA             | Malaysia              |
| 16 | WA016 | PI-349553          | <i>Amaranthus tricolor</i> L.        | USDA             | Papua New Guinea      |
| 17 | WA017 | PI-419057          | <i>Amaranthus tricolor</i> L.        | USDA             | China                 |
| 18 | WA018 | PI-599683          | <i>Amaranthus tricolor</i> L.        | USDA             | India                 |
| 19 | WA019 | PI-604669          | <i>Amaranthus tricolor</i> L.        | USDA             | Taiwan                |
| 20 | WA020 | PI-607446          | <i>Amaranthus tricolor</i> L.        | USDA             | Thailand              |
| 21 | WA021 | PI-608761          | <i>Amaranthus tricolor</i> L.        | USDA             | India                 |
| 22 | WA022 | I 942              | <i>Amaranthus tricolor</i> L.        | NARO Genebank    | Nepal                 |
| 23 | WA023 | Y-3233(1)D         | <i>Amaranthus tricolor</i> L.        | NARO Genebank    | Nepal                 |
| 24 | WA024 | Y-3233(2)D         | <i>Amaranthus tricolor</i> L.        | NARO Genebank    | Nepal                 |
| 25 | WA025 | Y-3245(1)D         | <i>Amaranthus tricolor</i> L.        | NARO Genebank    | Nepal                 |
| 26 | WA026 | Y-3245(2)D         | <i>Amaranthus tricolor</i> L.        | NARO Genebank    | Nepal                 |
| 27 | WA027 | Amaranth           | <i>Amaranthus tricolor</i> L.        | NARO Genebank    | na                    |
| 28 | WA028 | PI538322           | <i>Amaranthus hypochondriacus</i> L. | USDA             | USA                   |
| 29 | WA031 | PI419121           | <i>Amaranthus tricolor</i> L.        | USDA             | China                 |
| 30 | WA036 | PI603896           | <i>Amaranthus tricolor</i> L.        | USDA             | USA                   |
| 31 | WA039 | PI604670           | <i>Amaranthus tricolor</i> L.        | USDA             | Taiwan                |
| 32 | WA040 | Ames34159          | <i>Amaranthus tricolor</i> L.        | USDA             | India                 |
| 33 | WA041 | PI604668           | <i>Amaranthus tricolor</i> L.        | USDA             | Taiwan                |
| 34 | WA043 | PI277269           | <i>Amaranthus tricolor</i> L.        | USDA             | India                 |
| 35 | WA044 | PI603897           | <i>Amaranthus tricolor</i> L.        | USDA             | USA                   |
| 36 | WA045 | PI462128           | <i>Amaranthus tricolor</i> L.        | USDA             | India                 |
| 37 | WA046 | PI277267           | <i>Amaranthus tricolor</i> L.        | USDA             | India                 |
| 38 | WA047 | Ames2214           | <i>Amaranthus tricolor</i> L.        | USDA             | USA                   |
| 39 | WA048 | Ames29505          | <i>Amaranthus tricolor</i> L.        | USDA             | Brazil                |
| 40 | WA049 | Ames29504          | <i>Amaranthus tricolor</i> L.        | USDA             | Brazil                |
| 41 | WA050 | PI462127           | <i>Amaranthus tricolor</i> L.        | USDA             | India                 |
| 42 | WA055 | PI636179           | <i>Amaranthus tricolor</i> L.        | USDA             | Taiwan                |
| 43 | WA056 | Ames25153          | <i>Amaranthus tricolor</i> L.        | USDA             | USA                   |
| 44 | WA057 | Ames25152          | <i>Amaranthus tricolor</i> L.        | USDA             | USS                   |
| 45 | WA059 | PI667172           | <i>Amaranthus tricolor</i> L.        | USDA             | India                 |
| 46 | WA060 | Ames2103           | <i>Amaranthus tricolor</i> L.        | USDA             | India                 |
| 47 | WA061 | PI632237           | <i>Amaranthus tricolor</i> L.        | USDA             | USA                   |
| 48 | WA062 | Ames15328          | <i>Amaranthus tricolor</i> L.        | USDA             | USA                   |
| 49 | WA063 | Ames15330          | <i>Amaranthus tricolor</i> L.        | USDA             | China                 |
| 50 | WA064 | Ames29035          | <i>Amaranthus tricolor</i> L.        | USDA             | India                 |

| No  | Code  | Name      | Scientific name               | Seed distributor | Country of collection |
|-----|-------|-----------|-------------------------------|------------------|-----------------------|
| 51  | WA068 | Ames5311  | <i>Amaranthus tricolor</i> L. | USDA             | India                 |
| 52  | WA069 | PI666331  | <i>Amaranthus tricolor</i> L. | USDA             | India                 |
| 53  | WA070 | Ames26230 | <i>Amaranthus tricolor</i> L. | USDA             | China                 |
| 54  | WA071 | Ames26229 | <i>Amaranthus tricolor</i> L. | USDA             | China                 |
| 55  | WA072 | Ames26228 | <i>Amaranthus tricolor</i> L. | USDA             | China                 |
| 56  | WA073 | Ames26226 | <i>Amaranthus tricolor</i> L. | USDA             | China                 |
| 57  | WA074 | Ames26225 | <i>Amaranthus tricolor</i> L. | USDA             | China                 |
| 58  | WA075 | Ames26223 | <i>Amaranthus tricolor</i> L. | USDA             | China                 |
| 59  | WA076 | Ames26221 | <i>Amaranthus tricolor</i> L. | USDA             | China                 |
| 60  | WA077 | Ames26220 | <i>Amaranthus tricolor</i> L. | USDA             | China                 |
| 61  | WA078 | Ames26219 | <i>Amaranthus tricolor</i> L. | USDA             | China                 |
| 62  | WA079 | Ames26218 | <i>Amaranthus tricolor</i> L. | USDA             | China                 |
| 63  | WA080 | Ames26217 | <i>Amaranthus tricolor</i> L. | USDA             | China                 |
| 64  | WA081 | Ames26216 | <i>Amaranthus tricolor</i> L. | USDA             | China                 |
| 65  | WA082 | Ames26215 | <i>Amaranthus tricolor</i> L. | USDA             | China                 |
| 66  | WA083 | Ames26214 | <i>Amaranthus tricolor</i> L. | USDA             | China                 |
| 67  | WA084 | Ames26213 | <i>Amaranthus tricolor</i> L. | USDA             | China                 |
| 68  | WA085 | Ames26212 | <i>Amaranthus tricolor</i> L. | USDA             | China                 |
| 69  | WA086 | Ames26211 | <i>Amaranthus tricolor</i> L. | USDA             | China                 |
| 70  | WA087 | Ames26210 | <i>Amaranthus tricolor</i> L. | USDA             | China                 |
| 71  | WA089 | Ames26209 | <i>Amaranthus tricolor</i> L. | USDA             | China                 |
| 72  | WA090 | Ames26232 | <i>Amaranthus tricolor</i> L. | USDA             | China                 |
| 73  | WA091 | Ames26227 | <i>Amaranthus tricolor</i> L. | USDA             | China                 |
| 74  | WA092 | Ames26222 | <i>Amaranthus tricolor</i> L. | USDA             | China                 |
| 75  | WA093 | Ames26208 | <i>Amaranthus tricolor</i> L. | USDA             | China                 |
| 76  | WA094 | PI619252  | <i>Amaranthus tricolor</i> L. | USDA             | India                 |
| 77  | WA099 | PI603899  | <i>Amaranthus tricolor</i> L. | USDA             | USA                   |
| 78  | WA101 | NSL6100   | <i>Amaranthus tricolor</i> L. | USDA             | USA                   |
| 79  | WA102 | Ames5303  | <i>Amaranthus tricolor</i> L. | USDA             | USA                   |
| 80  | WA112 | PI669847  | <i>Amaranthus tricolor</i> L. | USDA             | India                 |
| 81  | WA116 | Ames18049 | <i>Amaranthus tricolor</i> L. | USDA             | Nepal                 |
| 82  | WA117 | PI566899  | <i>Amaranthus tricolor</i> L. | USDA             | India                 |
| 83  | WA118 | PI527321  | <i>Amaranthus tricolor</i> L. | USDA             | China                 |
| 84  | WA119 | PI478310  | <i>Amaranthus tricolor</i> L. | USDA             | China                 |
| 85  | WA120 | PI462129  | <i>Amaranthus tricolor</i> L. | USDA             | India                 |
| 86  | WA121 | PI462126  | <i>Amaranthus tricolor</i> L. | USDA             | India                 |
| 87  | WA123 | PI277268  | <i>Amaranthus tricolor</i> L. | USDA             | India                 |
| 88  | WA124 | PI214036  | <i>Amaranthus tricolor</i> L. | USDA             | India                 |
| 89  | WA125 | Ames5354  | <i>Amaranthus tricolor</i> L. | USDA             | Madagascar            |
| 90  | WA126 | Ames5317  | <i>Amaranthus tricolor</i> L. | USDA             | Hong Kong             |
| 91  | WA127 | PI667171  | <i>Amaranthus tricolor</i> L. | USDA             | India                 |
| 92  | WA129 | Ames5139  | <i>Amaranthus tricolor</i> L. | USDA             | USA                   |
| 93  | WA130 | PI674261  | <i>Amaranthus tricolor</i> L. | USDA             | India                 |
| 94  | WA131 | Ames5134  | <i>Amaranthus tricolor</i> L. | USDA             | USA                   |
| 95  | WA132 | Ames5128  | <i>Amaranthus tricolor</i> L. | USDA             | USA                   |
| 96  | WA133 | Ames5126  | <i>Amaranthus tricolor</i> L. | USDA             | USA                   |
| 97  | WA134 | Ames5118  | <i>Amaranthus tricolor</i> L. | USDA             | Puerto Rico           |
| 98  | WA135 | Ames5117  | <i>Amaranthus tricolor</i> L. | USDA             | Puerto Rico           |
| 99  | WA136 | Ames5113  | <i>Amaranthus tricolor</i> L. | USDA             | Taiwan                |
| 100 | WA137 | Ames5111  | <i>Amaranthus tricolor</i> L. | USDA             | Papua New Guinea      |



| No  | Code  | Name     | Scientific name               | Seed distributor | Country of collection |
|-----|-------|----------|-------------------------------|------------------|-----------------------|
| 101 | WA138 | Ames5110 | <i>Amaranthus tricolor</i> L. | USDA             | West Africa           |
| 102 | WA139 | Ames5101 | <i>Amaranthus tricolor</i> L. | USDA             | Hong Kong             |
| 103 | WA140 | Ames5100 | <i>Amaranthus tricolor</i> L. | USDA             | Hong Kong             |
| 104 | WA141 | Ames5099 | <i>Amaranthus tricolor</i> L. | USDA             | Hong Kong             |
| 105 | WA142 | Ames2230 | <i>Amaranthus tricolor</i> L. | USDA             | India                 |
| 106 | WA143 | Ames2229 | <i>Amaranthus tricolor</i> L. | USDA             | India                 |
| 107 | WA144 | Ames2228 | <i>Amaranthus tricolor</i> L. | USDA             | India                 |
| 108 | WA145 | Ames2227 | <i>Amaranthus tricolor</i> L. | USDA             | India                 |
| 109 | WA146 | Ames2226 | <i>Amaranthus tricolor</i> L. | USDA             | India                 |
| 110 | WA147 | Ames2225 | <i>Amaranthus tricolor</i> L. | USDA             | India                 |
| 111 | WA148 | Ames2224 | <i>Amaranthus tricolor</i> L. | USDA             | India                 |
| 112 | WA149 | Ames2223 | <i>Amaranthus tricolor</i> L. | USDA             | India                 |
| 113 | WA150 | Ames2222 | <i>Amaranthus tricolor</i> L. | USDA             | India                 |
| 114 | WA151 | Ames2221 | <i>Amaranthus tricolor</i> L. | USDA             | India                 |
| 115 | WA152 | Ames2209 | <i>Amaranthus tricolor</i> L. | USDA             | Hong Kong             |
| 116 | WA153 | PI674260 | <i>Amaranthus tricolor</i> L. | USDA             | Hong Kong             |
| 117 | WA154 | Ames2207 | <i>Amaranthus tricolor</i> L. | USDA             | Hong Kong             |
| 118 | WA155 | Ames2205 | <i>Amaranthus tricolor</i> L. | USDA             | Hong Kong             |
| 119 | WA156 | Ames2204 | <i>Amaranthus tricolor</i> L. | USDA             | Hong Kong             |
| 120 | WA157 | Ames2203 | <i>Amaranthus tricolor</i> L. | USDA             | Hong Kong             |
| 121 | WA158 | Ames2202 | <i>Amaranthus tricolor</i> L. | USDA             | Hong Kong             |
| 122 | WA159 | Ames2199 | <i>Amaranthus tricolor</i> L. | USDA             | Taiwan                |
| 123 | WA160 | Ames2198 | <i>Amaranthus tricolor</i> L. | USDA             | Hong Kong             |
| 124 | WA161 | Ames2197 | <i>Amaranthus tricolor</i> L. | USDA             | Hong Kong             |
| 125 | WA162 | Ames2196 | <i>Amaranthus tricolor</i> L. | USDA             | Hong Kong             |
| 126 | WA163 | Ames2149 | <i>Amaranthus tricolor</i> L. | USDA             | India                 |
| 127 | WA164 | Ames2148 | <i>Amaranthus tricolor</i> L. | USDA             | India                 |
| 128 | WA165 | Ames2147 | <i>Amaranthus tricolor</i> L. | USDA             | India                 |
| 129 | WA166 | Ames2146 | <i>Amaranthus tricolor</i> L. | USDA             | India                 |
| 130 | WA167 | Ames2145 | <i>Amaranthus tricolor</i> L. | USDA             | India                 |
| 131 | WA168 | Ames2143 | <i>Amaranthus tricolor</i> L. | USDA             | India                 |
| 132 | WA169 | Ames2142 | <i>Amaranthus tricolor</i> L. | USDA             | India                 |
| 133 | WA170 | Ames2140 | <i>Amaranthus tricolor</i> L. | USDA             | India                 |
| 134 | WA171 | Ames2139 | <i>Amaranthus tricolor</i> L. | USDA             | India                 |
| 135 | WA172 | Ames2138 | <i>Amaranthus tricolor</i> L. | USDA             | India                 |
| 136 | WA173 | Ames2135 | <i>Amaranthus tricolor</i> L. | USDA             | India                 |
| 137 | WA174 | Ames2134 | <i>Amaranthus tricolor</i> L. | USDA             | India                 |
| 138 | WA175 | Ames2132 | <i>Amaranthus tricolor</i> L. | USDA             | India                 |
| 139 | WA176 | Ames2131 | <i>Amaranthus tricolor</i> L. | USDA             | India                 |
| 140 | WA177 | Ames2130 | <i>Amaranthus tricolor</i> L. | USDA             | India                 |
| 141 | WA178 | Ames2129 | <i>Amaranthus tricolor</i> L. | USDA             | India                 |
| 142 | WA179 | Ames2128 | <i>Amaranthus tricolor</i> L. | USDA             | India                 |
| 143 | WA180 | Ames2127 | <i>Amaranthus tricolor</i> L. | USDA             | India                 |
| 144 | WA181 | Ames2126 | <i>Amaranthus tricolor</i> L. | USDA             | India                 |
| 145 | WA182 | Ames2125 | <i>Amaranthus tricolor</i> L. | USDA             | India                 |
| 146 | WA183 | Ames2124 | <i>Amaranthus tricolor</i> L. | USDA             | India                 |
| 147 | WA184 | Ames2123 | <i>Amaranthus tricolor</i> L. | USDA             | India                 |
| 148 | WA185 | Ames2122 | <i>Amaranthus tricolor</i> L. | USDA             | India                 |
| 149 | WA186 | Ames2121 | <i>Amaranthus tricolor</i> L. | USDA             | India                 |
| 150 | WA187 | Ames2120 | <i>Amaranthus tricolor</i> L. | USDA             | India                 |

| No  | Code  | Name     | Scientific name                      | Seed distributor | Country of collection |
|-----|-------|----------|--------------------------------------|------------------|-----------------------|
| 151 | WA188 | Ames2119 | <i>Amaranthus tricolor</i> L.        | USDA             | India                 |
| 152 | WA189 | Ames2118 | <i>Amaranthus tricolor</i> L.        | USDA             | India                 |
| 153 | WA190 | Ames2117 | <i>Amaranthus tricolor</i> L.        | USDA             | India                 |
| 154 | WA191 | Ames2116 | <i>Amaranthus tricolor</i> L.        | USDA             | India                 |
| 155 | WA192 | Ames2114 | <i>Amaranthus tricolor</i> L.        | USDA             | India                 |
| 156 | WA193 | Ames2113 | <i>Amaranthus tricolor</i> L.        | USDA             | India                 |
| 157 | WA194 | Ames2112 | <i>Amaranthus tricolor</i> L.        | USDA             | India                 |
| 158 | WA195 | Ames2110 | <i>Amaranthus tricolor</i> L.        | USDA             | India                 |
| 159 | WA196 | Ames2109 | <i>Amaranthus tricolor</i> L.        | USDA             | India                 |
| 160 | WA197 | Ames2108 | <i>Amaranthus tricolor</i> L.        | USDA             | India                 |
| 161 | WA198 | Ames2107 | <i>Amaranthus tricolor</i> L.        | USDA             | India                 |
| 162 | WA199 | Ames2106 | <i>Amaranthus tricolor</i> L.        | USDA             | India                 |
| 163 | WA200 | Ames2105 | <i>Amaranthus tricolor</i> L.        | USDA             | India                 |
| 164 | WA201 | Ames2104 | <i>Amaranthus tricolor</i> L.        | USDA             | India                 |
| 165 | WA202 | Ames2102 | <i>Amaranthus tricolor</i> L.        | USDA             | India                 |
| 166 | WA203 | Ames2101 | <i>Amaranthus tricolor</i> L.        | USDA             | India                 |
| 167 | WA204 | Ames2100 | <i>Amaranthus tricolor</i> L.        | USDA             | India                 |
| 168 | WA206 | Ames2040 | <i>Amaranthus tricolor</i> L.        | USDA             | Malaysia              |
| 169 | WA207 | Ames2039 | <i>Amaranthus tricolor</i> L.        | USDA             | Thailand              |
| 170 | WA208 | Ames2029 | <i>Amaranthus tricolor</i> L.        | USDA             | China                 |
| 171 | WA209 | Ames2024 | <i>Amaranthus tricolor</i> L.        | USDA             | Taiwan                |
| 172 | WA210 | Ames2017 | <i>Amaranthus tricolor</i> L.        | USDA             | China                 |
| 173 | WA211 | Ames1998 | <i>Amaranthus tricolor</i> L.        | USDA             | Taiwan                |
| 174 | WA212 | Ames1993 | <i>Amaranthus tricolor</i> L.        | USDA             | Taiwan                |
| 175 | WA213 | Ames1983 | <i>Amaranthus tricolor</i> L.        | USDA             | India                 |
| 176 | WA214 | Ames1982 | <i>Amaranthus tricolor</i> L.        | USDA             | India                 |
| 177 | WA215 | Ames1980 | <i>Amaranthus tricolor</i> L.        | USDA             | Zaire                 |
| 178 | WA217 | PI337611 | <i>Amaranthus hypochondriacus</i> L. | USDA             | Uganda                |
| 179 | WA221 | Ames2141 | <i>Amaranthus tricolor</i> L.        | USDA             | India                 |
| 180 | WA222 | PI636187 | <i>Amaranthus hypochondriacus</i> L. | USDA             | India                 |
| 181 | WA223 | Ames5689 | <i>Amaranthus hypochondriacus</i> L. | USDA             | Brazil                |
| 182 | WA224 | PI667174 | <i>Amaranthus hypochondriacus</i> L. | USDA             | Zimbabwe              |

na, not available.

**Supplemental Table 3. SSR markers developed from the sequence data of *A. tricolor***

| Marker | Forward primer sequence | Reverse primer sequence | Repeat motif | Size (bp) |
|--------|-------------------------|-------------------------|--------------|-----------|
| TAM001 | ACCTCTCTCAGAAAGCCGTG    | AAGCGAACCAGAAAAGTGCAG   | (AAAT)8      | 319       |
| TAM002 | ATGTGGTTAAGGCCTGAGGG    | CCAACACCATCATAGAGTCCAC  | (AAAT)6      | 204       |
| TAM003 | GGGAGGTTTAAGGGAGTGGG    | ACCCTTCTTTCAACCCACC     | (AAT)6       | 209       |
| TAM004 | AAATAGTGGAGGGCTCGGAC    | CTCGTAACGGGTGCAACTTC    | (AAT)7       | 122       |
| TAM005 | AATGGGTTAGGGCGGGTATC    | CAGCTTAACACTGCGGCTAC    | (AT)8        | 213       |
| TAM006 | TGCATGCCAAGTCCGAATTC    | GCTCAGCTTGTGTCGACTC     | (AAT)7       | 408       |
| TAM007 | ATCTGACCGTGGCTGATACC    | ACGATGAGTATGGGCCCTTC    | (AT)7        | 395       |
| TAM008 | TCTAGCAGTCACCGGTTAGC    | CAGGTTTACGCTGGCAGAAG    | (AAT)6       | 399       |
| TAM009 | CACGTACACTGTAGCTTGCG    | TTGATGGTGCTCCCTACGTC    | (ATC)6       | 390       |
| TAM010 | TTGTTTGGCACTGTATCGCC    | GGGATAGGTAGTTGGAGGCG    | (AAT)6       | 229       |
| TAM011 | AACGGCGCTATAAGTTGCAG    | GTGCAAGCAGAGGGAAACAG    | (ATC)6       | 288       |
| TAM012 | GGCTCGCCATTTACTCATG     | ACCTAGATCTGCGTTCGGTC    | (AAT)6       | 212       |
| TAM013 | CCGAGGGAAACACGTCTTTG    | CCGCAGCAAATAAGGGGAAGG   | (AT)7        | 380       |
| TAM014 | AAATGCGAGCAGTTCAGTCG    | CACATGTGCAGAGGTTTGGG    | (AAT)8       | 399       |
| TAM015 | TAAAGCCCGCATGATTCGTG    | CGTTTGGGAATACGAGCACC    | (AAG)7       | 192       |
| TAM016 | AACCGTGGGAAATGCTTTGG    | CACGTTCTGTTACTTCCCAGC   | (AT)7        | 417       |
| TAM017 | GTGATTCCGCGTTCATCTG     | CAGAGTCCAAAACCCGATGC    | (AT)8        | 316       |
| TAM018 | TTTATGCGCCAAACTCCGAC    | AGAGGGAAGATGCCATGTCC    | (AT)9        | 402       |
| TAM019 | GACGCTTGGCTCTTGTTC      | GGGTGCTCAGCTTGTTC       | (AAT)7       | 314       |
| TAM020 | GCAACGTGACCCAGAACATC    | TCCGTCTTAACCATGGCC      | (AAC)7       | 365       |
| TAM021 | TGGGTATAGTTCGCCACACC    | ACACCCTTCTCCCTTCC       | (ATC)7       | 430       |
| TAM022 | TCGCACTGATTCAACGGTTG    | AGCCCATCTCCATAAGCAG     | (AC)8        | 447       |
| TAM023 | GCGCACACCATCTGTAGTG     | GGCGTCTCTAGCATAGTC      | (ATC)6       | 264       |
| TAM024 | TGCGTCTTTGTGATTGTCCG    | ACGCGACAAGATATCCTCCC    | (ATC)6       | 450       |
| TAM025 | CCGATTAAGAATGGCGGCC     | ATGTCCGTATCCTGTGTCCG    | (AAG)8       | 408       |
| TAM026 | CAAGGCCAACACCAGCTATG    | AGTATGAGGGTACGTGCTGC    | (AGG)7       | 362       |
| TAM027 | ACTCACCCACACCATCTTCC    | AATTGTTAGCACGAGTCGCC    | (ATC)8       | 341       |
| TAM028 | CCCATGTGCATCAATCGACC    | CACCTCCTTCAACAATGGCC    | (AGG)6       | 262       |
| TAM029 | CTCCATCTCTCTTGTCCCG     | TTGCGAGGCCTTTAAAGCAG    | (AT)8        | 435       |
| TAM030 | TACCGTCACATCCGTCGTAC    | AGTTGCGCAAAGAGTTCGTC    | (AAT)9       | 440       |
